# Supplementary material
Source: publisher figshare collection journal article supplement (https://tandf.figshare.com/articles/dataset/_/9980720)
Supplement: Supplementary file 1 [file 2]

Archive with 4 entries (4 files):
- tbsd_a_1680437_sm9486.docx
- tbsd_a_1680437_sm9485.docx
- tbsd_a_1680437_sm9484.docx
- tbsd_a_1680437_sm9483.pdf
