# Supplementary material
Source: publisher figshare collection journal article supplement (https://tandf.figshare.com/articles/dataset/_/9980720)
Supplement: Supplementary file 1 [file 2 › tbsd_a_1680437_sm9483.pdf]

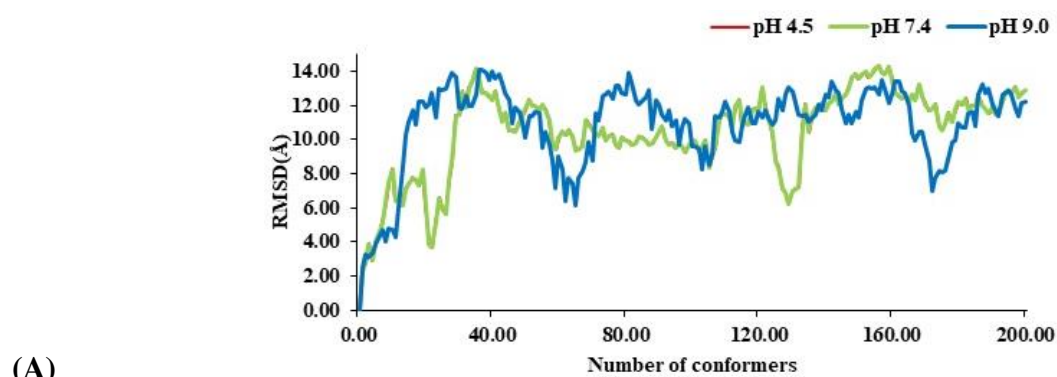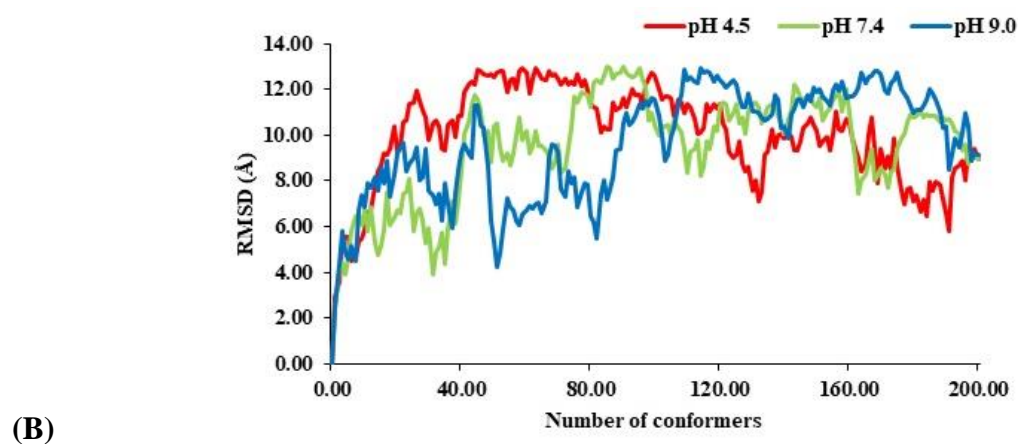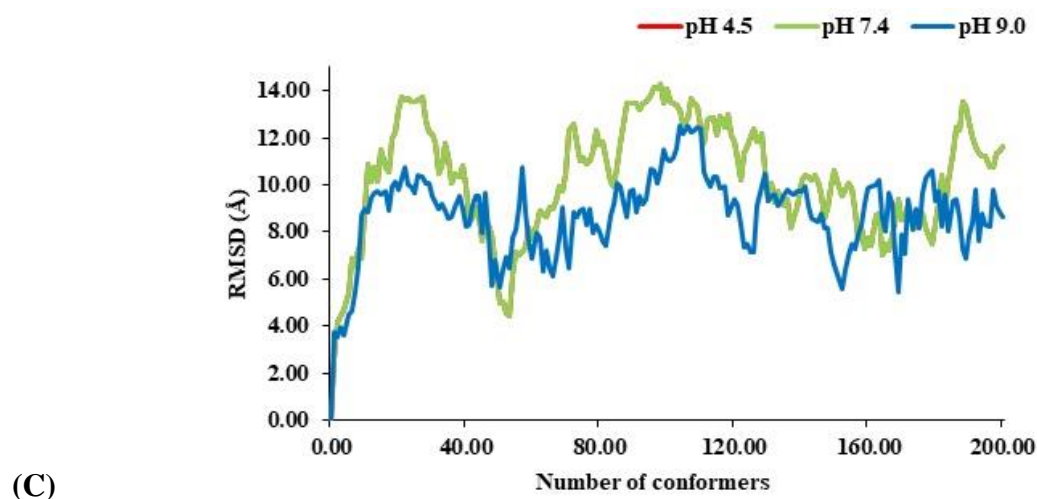

**Supplementary Figure 2.** Line graphs for RMSD of the conformers of tritrypticins- (A) T1 (B) T5 (C) T7 at pH 4.5, 7.4 and 9.0. It should be noted that the RMSD curves of T1 and T7 overlap at pH 4.5 and pH 7.4.
