# Supplementary material
Source: publisher figshare collection journal article supplement (https://tandf.figshare.com/articles/dataset/_/9980720)
Supplement: Supplementary file 1 [file 2 › tbsd_a_1680437_sm9484.docx]

**Details of energy minimization of tritrpticin by YAMBER forcefield.**

YAMBER force field energy minimized the tritrpticin peptides in an aqueous environment, using a multiple time step of 1fs and 2fs to optimize the intramolecular and intermolecular forces, respectively, in a unit cell of periodic boundary extension of 20 Å. A cut-off of 7.9 Å for Lennard-Jones forces was used and the electrostatic forces were calculated, using Particle Mesh Ewald method. This was followed by simulated annealing minimization beginning at 310 K, for a total of 5ps. Finally, the severe bumps in tritrpticin peptides were removed, using steepest descent algorithm.
