# Supplementary material
Source: publisher figshare collection journal article supplement (https://tandf.figshare.com/articles/dataset/_/9980720)
Supplement: Supplementary file 1 [file 2 › tbsd_a_1680437_sm9485.docx]

**(A)**
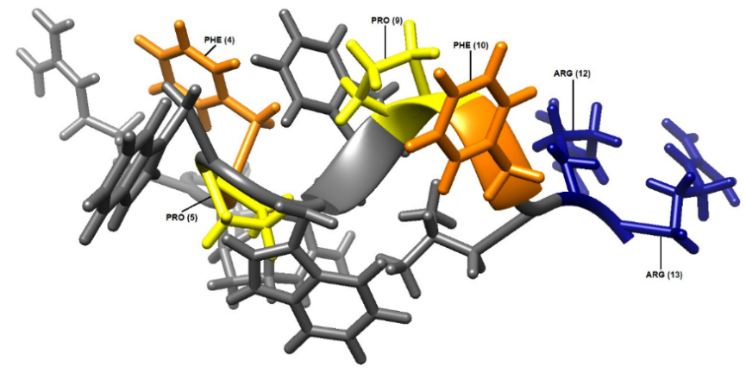


**(B)**
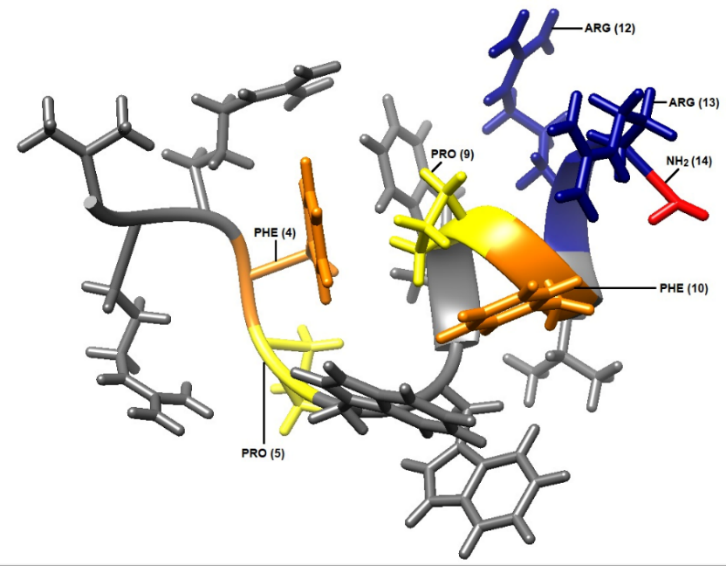


**(C)**
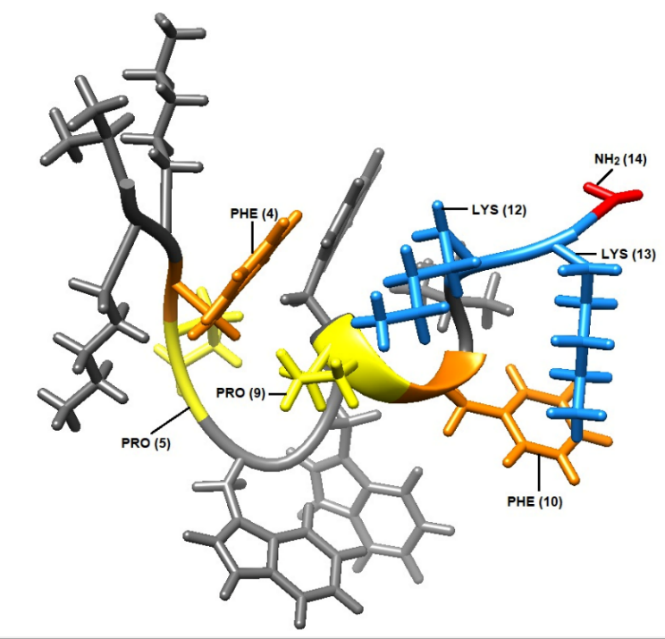


**(D)**
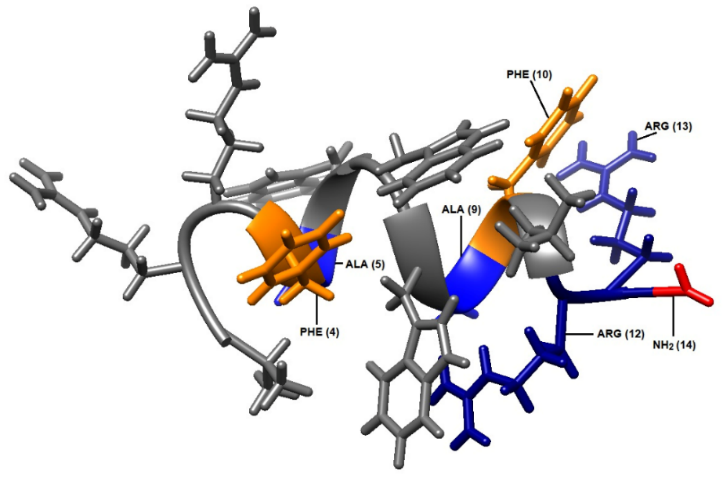


**(E)**
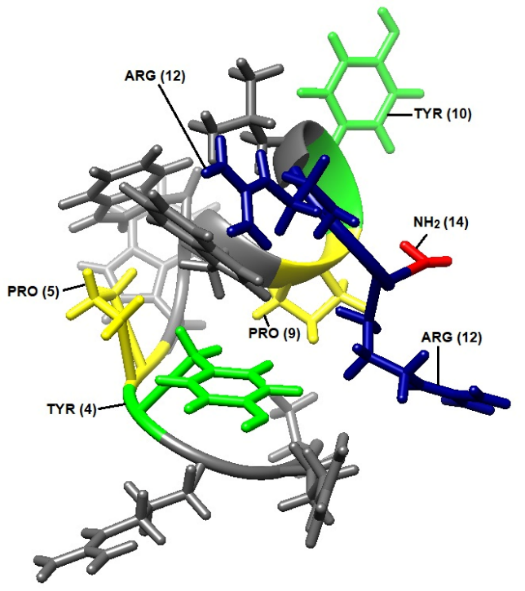


**(F)**
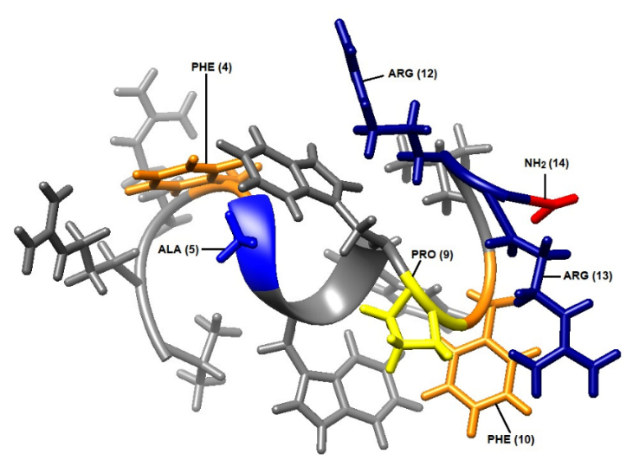


**(G)**
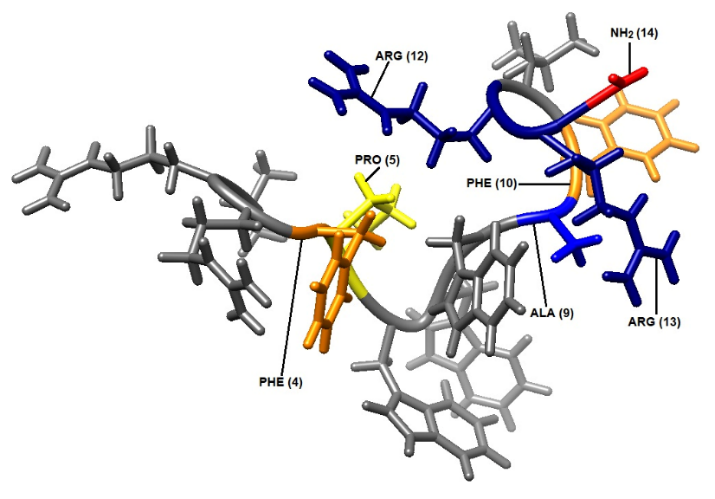


**Supplementary Figure 1.** Static 3D structures of native tritrpticin and its analogs- **(A)** NT, **(B)** T1, **(C)** T2, **(D)** T3, **(E)** T5, **(F)** T7 and **(G)** T8. The NH2 group at the N-terminal of synthetic analogs of tritrpticin is colored red. The unique amino acid combinations, present in different synthetic analogs of tritrpticins are illustrated using different colors.

**Supplementary Table 1.** Toxicity scores of tritrpticins using TOXINPRED program.

| **Sl. No.** | **Tritrpticin** | **SVM score** | **Prediction – Toxin (t)/ Non-toxin (nt)** |
| --- | --- | --- | --- |
| 1. | NT | -1.22 | nt |
| 2. | T1 | -1.22 | nt |
| 3. | T2 | -0.79 | nt |
| 4. | T5 | -0.72 | nt |
| 5. | T7 | -1.07 | nt |
| 6. | T8 | -1.15 | nt |
